# Supplementary material
Source: PubMed Central journal article supplement (PMC7237772)
Supplement: AEM.00303-20-s0001.pdf [file AEM.00303-20-s0001.pdf]

### ***Tritrichomonas musculus* XZH isolate ITS sequence:**

AATACGTCCCCTGCCCTTTGTACACACCGCCCGTCGCTCCTACCGATTGGATGACTCGGTGAAATTATCGGAGTTTTT  
TTACAAAGGTAATTAATCACGTTATCTAGAGGAAGGAGAAGTCGTAACAAGGTATCGGTAGGTGAACCTGCCGATG  
GATCAGTTTCGTAATTTAATCACAAACATATTTTTTAAAAAATTATCTAAAATACAAATTAATAATAAAAAACA  
AAAAATTTAGACCTTAGGCAATGGATGTCTTGGCTTCTTACACGGGGAAGAACGTTGCATAATGCGATAAGCGGCTG  
GAGTTGCTTACTTTGCGACAAGTTCGATCTTTGAATGCACATTGCGCGCCGTCGAGCTTCGGCTTTGACACGCATATA  
TGGTACAGTAACCCATAATAGTTTAAAAAATCTTTTTTACGCAAAAAGAGCGAAAAATTTATATGTAACCAACGTAAG  
GGTTCTGTGCTATATAGGAAGACCCGCTGAAGTGAAGCATCTCATTAAAGCGGAGGA

### **Multiple sequence alignment of the selected ITS sequences as shown below using the EMBL-EBI search and sequence analysis tools APIs:**

```
1 T.muris AY886843 -----ATCAGTTTCGTA TAAATTTAAACACAAAAAT TTTTTTTT-TAAT
2 T.rainier MH370486 CGATGGATCAGTTTCG--TAAATTTAATCACAAACATA TTTTTTTT-AAAA
3 Tritrichomonas XZH isolateITS CGATGGATCAGTTTCG--TAAATTTAATCACAAACATA TTTTTTTT-AAAA
4 T.musculus KX000922 CGATGGATCAGTTTCG--TAAATTTAATCACAAACATA TTTTTTTTAAAA

1 T.muris AY886843 C T A T A T A A C C T T T T A A C A T A - C A A A C A A T A A A A A C A A A T A A A A A A A T T T
2 T.rainier MH370486 A A A T A T A A C C T T T T A T A C A A A T T A A A T A A T A A A A A C - - - - A A A A A A T T T
3 Tritrichomonas XZH isolateITS A A A A A T A T A T C T A A A A T A C A A A T T A A A T A A T A A A A A C - - - - A A A A A A T T T
4 T.musculus KX000922 A A A A A T T A T C T A A A A T A C A A A T T A A A T A A T A A A A A C - - - - A A A A A A T T T

1 T.muris AY886843 A G A C C T T A G G C A A T G G A T G T C T T G G C T T C T T A C A C G A T G A A G A A C G T T G C
2 T.rainier MH370486 A G A C C T T A G G C A A T G G A T G T C T T G G C T T C T T A C A C G A G A A G A A C G T T G C
3 Tritrichomonas XZH isolateITS A G A C C T T A G G C A A T G G A T G T C T T G G C T T C T T A C A C G G G A A G A A C G T T G C
4 T.musculus KX000922 A G A C C T T A G G C A A T G G A T G T C T T G G C T T C T T A C A C G A G A A G A A C G T T G C

1 T.muris AY886843 A T A A T G C G A T A A G C G G C T G G A G T T G C T T T C T T T G C G A C A A G T T C G A T C T T
2 T.rainier MH370486 A T A A T G C G A T A A G C G G C T G G A G T T G C T T A C T T T G C G A C A A G T T C G A T C T T
3 Tritrichomonas XZH isolateITS A T A A T G C G A T A A G C G G C T G G A G T T G C T T A C T T T G C G A C A A G T T C G A T C T T
4 T.musculus KX000922 A T A A T G C G A T A A G C G G C T G G A G T T G C T T A C T T T G C G A C A A G T T C G A T C T T

1 T.muris AY886843 T G A A T G C A T A T T G C G C C C G T C G G G C T T C T G C T T T G A C A C G C A T A T A T G G
2 T.rainier MH370486 T G A A T G C A C A T T G C G C C C G T C G A G C T T C G G C T T T G A C A C G C A T A T A T G G
3 Tritrichomonas XZH isolateITS T G A A T G C A C A T T G C G C C C G T C G A G C T T C G G C T T T G A C A C G C A T A T A T G G
4 T.musculus KX000922 T G A A T G C A T A T T G C G C C C G T C G A G C T T C G G C T T T G A C A C G C A T A T A T G G

1 T.muris AY886843 T A C A G T A A C C C A T A A T A G T T T A A A A A A A A T C T C T T T T T A C G T A A A A G A G
2 T.rainier MH370486 T C C A G T A A C C C A T A A T A G T T T - - - A A A A A A T C T C T T T T T A C G C A A A A G A G
3 Tritrichomonas XZH isolateITS T A C A G T A A C C C A T A A T A G T T T - - - A A A A A A T C T C T T T T T A C G C A A A A G A G
4 T.musculus KX000922 T A C A G T A A C C C A T A A T A G T T T - - A A A A A A A T C T C T T T T T A C G C A A A A G A G

1 T.muris AY886843 C G A A A A A T T T A T A T G T A T A A A A C G A A A G G G T T C T G T A T C A T A T A - - - - -
2 T.rainier MH370486 C G A A A A A T T T A T A T G T A A C C A A C G T A A G G G T T C T G T G C T A T A T A G G A A G -
3 Tritrichomonas XZH isolateITS C G A A A A A T T T A T A T G T A A C C A A C G T A A G G G T T C T G T G C T A T A T A G G A A G A
4 T.musculus KX000922 C G A A A A A T T T A T A T G T A A C C A A C G T A A G G G T T C T G T G C T A T A T A G G A A G -
```

### ***Tritrichomonas musculus* XZH isolate 18S sequence:**

TGCGCTACCTGGTTGATCCTGCCAAGGAAGCACACTTCGGTCATAGATTAAGCCATGCAAGTGTTAGTTCAGGCAAC  
GAAACTGCGAACAGCTCATTAATACGCTCAGAATCTACTTGGTGGCAACCTTTACAGTTTTATTTGGATAGCAGCAGT  
AATTCTGGTGCTAATACATGCGATTGTTTCACTAGCTTGAGAAATAGTGGAAAAAGTTGACCCTTACGGGCACACCAA  
TCGATTGAGCGACCTATCATGCTGTACTTAGGGTCTTTACCTAGGTAGGCTATACGGGTAACGGGCGGTTACCGTC  
GGACTGCCGGAAGGGGCTGAGAGATAGCCACTATATCCACGGGTAGCAGCAGGCGCGAAACTTACCCACTCGA  
GACTTTGCGAGGTGGTAATGACCAGTCCATGTCATCCCTACGGGTTGTTTTGGATAGGATCACACTTTCCAGTGTG  
GTGCAATCTAGCAGAGGGCCAGTCTGGTGCCAGCAGCTGCGGTAATTCCAGCTCTGCGAGTTTGCTCCCATATTGTT  
GCAGTTAAAAACGCTCGTAGTCAGAATTGCCCGAAGGGCTTGCGAACCTTCTGTTCTGTTCACTGTGAACAATCAGG  
ACGCTTAGCGTATGGTTATCAGGAATGACTACGGCAGTATGATATCTTTACTTCTAGTAAAAATCAATGAGAGCCACC  
GGGGGTAGATCTATTTATGCGCAACGGTGAATGTTCTGACCCATGAGAGAGAAACGAAGGCCAAAGCATCTACC  
TAGAGGGTTTCTGTCGATCAAAGGGCGAGAGTAGGAGTATCCAACCGGATCAGAGACCCGGGTAGTTCCTACCTTA  
ACAGTCCGACAGGGGCTTGCTTTAATGAGGGCAGGACCTTAGGAGAAATCAATAGTTCTTGGGCTCTGGGGGA  
ACTACGACCGCAAGGCTGAAACTTGAAGGAATTGACGGAAGGGCACACCAGGGGTGGAGCTTGTGGCTTAATTTG  
AATCAACACGGGGAACCTTACCAGGACCAGATGTTTTTATGACTGACAGGCTTCAGGCTTTTCAGGATATGATTTTT  
GGTGGTGCATGGCCGTTGGTGGTGGCTGGGTTGACCTGTCATGCGTTGATTGAGATAACGAGCAGATATCGCCAA  
TAAATACCAGGATCTGCTTTCAGAGCCATGTTTCTAATTTGGGACTCCCTGCGTTTCAAGCAGGGAAGAGGGGTAG  
CAATAACAGGTCCTGTATGTCCTTTAGATGCTCTGGGCTGCACGCGCTACAATGTTAGGATCAATGAGACTGCCG  
AGCCGAAAGGTTTTAGCTACTCTCACAACTAACCGTAGTTGGGATTGAGGATTGTAATCATTTCTCATGAAACAGGA  
ATCCCTTGAAATGTGTGCCAACAGCGCACGTTGAATACGTCCCTGCCCTTTGACACACCGCCGCTGCTCCTACC  
GATTTGGATGACTCGGTGAAATTATCGGATTTTTTACAAAGGTAATTAATCACGTTATCCAGAGGAAGGAGAAAGT  
CGTAACAAGGTATCGGTAGGTGAACCTGCAAGAGGATCAAGGGCAATTCGAGATATCCATCACACTGGCGGCC  
GCTCGAGCATGCATCTAGAGGGCCCAATCGCC

Multiple sequence alignment of the selected 18S sequences as shown below using the EMBL-EBI search and sequence analysis tools APIs:

|                                     |                                                    |
|-------------------------------------|----------------------------------------------------|
| 1 <i>T. muris</i> AY886846          | GCAGTAAATTCGGTGCTAATACATGCCATTGTTTCACTACGTTGAGAAAT |
| 2 <i>Tritrichomonas</i> XZH isolate | GCAGTAAATTCGGTGCTAATACATGCCATTGTTTCACTACGTTGAGAAAT |
| 3 <i>T. musculus</i> KX000921       | TTTCACTACGTTGAGAAAT                                |
| 1 <i>T. muris</i> AY886846          | AGTGGAAAAGTTGACCCTTACGGGCACACCAATCGATTGAGCGACCTATC |
| 2 <i>Tritrichomonas</i> XZH isolate | AGTGGAAAAGTTGACCCTTACGGGCACACCAATCGATTGAGCGACCTATC |
| 3 <i>T. musculus</i> KX000921       | AGTGGAAAAGTTGACCCTTACGGGCACACCAATCGATTGAGCGACCTATC |
| 1 <i>T. muris</i> AY886846          | ATGCTTGTACTTAGGGTCTTTACCTAGGTAGGCATCACGGGTAACGGGC  |
| 2 <i>Tritrichomonas</i> XZH isolate | ATGCTTGTACTTAGGGTCTTTACCTAGGTAGGCATCACGGGTAACGGGC  |
| 3 <i>T. musculus</i> KX000921       | ATGCTTGTACTTAGGGTCTTTACCTAGGTAGGCATCACGGGTAACGGGC  |
| 1 <i>T. muris</i> AY886846          | GGTTACCFTCGGACTGCCGAGAAGGGCCGAGAGATAGCCACTATATC    |
| 2 <i>Tritrichomonas</i> XZH isolate | GGTTACCFTCGGACTGCCGAGAAGGGCCGAGAGATAGCCACTATATC    |
| 3 <i>T. musculus</i> KX000921       | GGTTACCFTCGGACTGCCGAGAAGGGCCGAGAGATAGCCACTATATC    |
| 1 <i>T. muris</i> AY886846          | CACGGGTAGCAGCAGGCCGCAAACTTACCCACTCGAGACTTCGGAGGTG  |
| 2 <i>Tritrichomonas</i> XZH isolate | CACGGGTAGCAGCAGGCCGCAAACTTACCCACTCGAGACTTCGGAGGTG  |
| 3 <i>T. musculus</i> KX000921       | CACGGGTAGCAGCAGGCCGCAAACTTACCCACTCGAGACTTCGGAGGTG  |
| 1 <i>T. muris</i> AY886846          | GTAATGACCAGTTCCATCTCATCCCTTTGGGGTATTTGGATAGGATCAC  |
| 2 <i>Tritrichomonas</i> XZH isolate | GTAATGACCAGTTCCATCTCATCCCTCACGGGTGTTTGGATAGGATCAC  |
| 3 <i>T. musculus</i> KX000921       | GTAATGACCAGTTCCATCTCATCCCTCACGGGTGTTTGGATAGGATCAC  |
| 1 <i>T. muris</i> AY886846          | ACTTTTCCAGTTCGGTGCATCTAGCAGAGGGCCAGTCTGGTCCAGCAG   |
| 2 <i>Tritrichomonas</i> XZH isolate | ACTTTTCCAGTTCGGTGCATCTAGCAGAGGGCCAGTCTGGTCCAGCAG   |
| 3 <i>T. musculus</i> KX000921       | ACTTTTCCAGTTCGGTGCATCTAGCAGAGGGCCAGTCTGGTCCAGCAG   |
| 1 <i>T. muris</i> AY886846          | CTGCGGTAATCCAGCTCTGCGAGTTTGCITCCCATATTGTTGCAGTTAAA |
| 2 <i>Tritrichomonas</i> XZH isolate | CTGCGGTAATCCAGCTCTGCGAGTTTGCITCCCATATTGTTGCAGTTAAA |
| 3 <i>T. musculus</i> KX000921       | CTGCGGTAATCCAGCTCTGCGAGTTTGCITCCCATATTGTTGCAGTTAAA |

18S sequence RAxML phylogenetic reconstruction (bootstrap score is indicated, branch length scale=0.01):

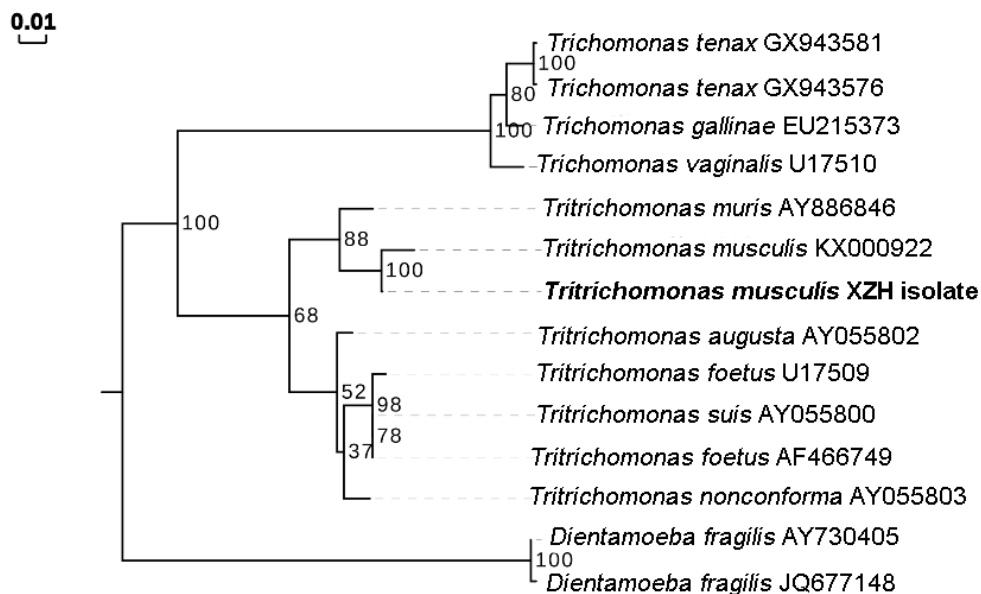

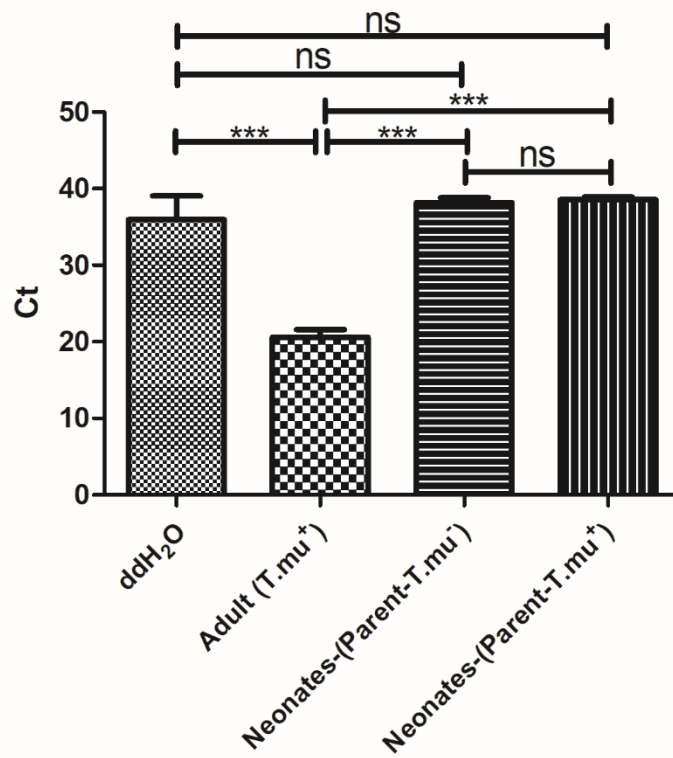

**Figure S1. Neonatal mice are *T. mu*-free.** qPCR was performed to determine the relative abundance of *T. mu*. Total DNA was isolated from cecal content of the indicated mice. Autoclaved water was used as protozoan-free control. Neonates were born either of mothers without protozoan colonization (Parent-*T. mu*<sup>-</sup>) or of mothers that orally administered with *T. mu* (Parent-*T. mu*<sup>+</sup>). n=3-6 per group, \*\*\*,  $P < 0.001$ ; ns, no statistical significance.

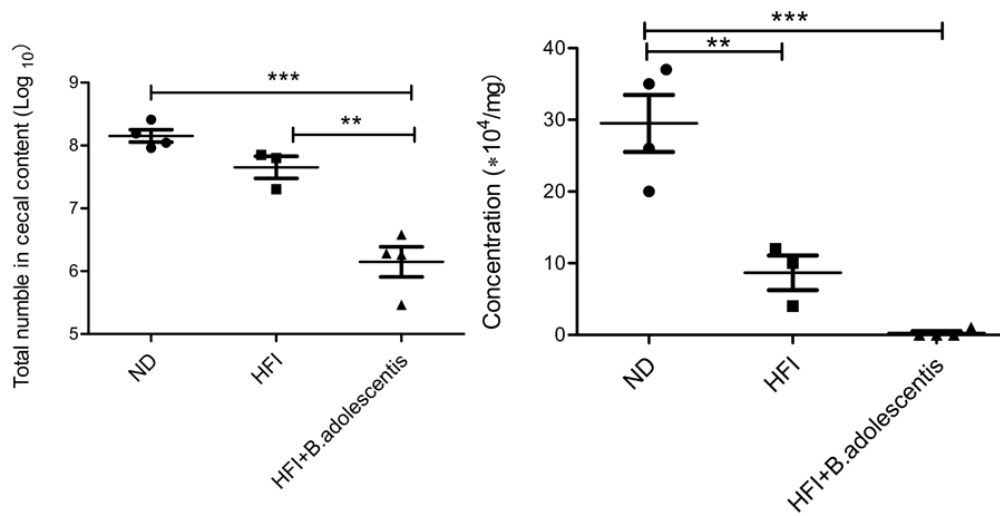

**Figure S2. *B. adolescentis* (ATCC 15703) inhibits *T. mu* colonization in inulin-enriched environment.** WT B6 mice were treated similarly as depicted in Figure 6A, except that *B. longum* JDM301 was replaced by *B. adolescentis* (ATCC 15703). The total number and concentration of *T. mu* in the cecal content from the mice fed either with ND, HFI, or HFI+B. *adolescentis* were monitored 7 days post *T. mu* administration. N=3-4/group. \*\*,  $P < 0.01$ ; \*\*\*,  $P < 0.001$ .
